# Supplementary material
Source: publisher figshare collection journal article supplement (https://frontiersin.figshare.com/ndownloader/files/25007816)
Supplement: Supplementary file [file 25007816]

**Table S8. Homologs Search for the RR AbrB1.**

Amino acid sequence comparisons between different RRs. Pairwise alignments were performed in *EMBOSS Needle* (EMBL-EBI), which uses the Needleman-Wunsch algorithm, applying a BLOSUM62 substitution matrix.

| Protein | Organism                       | Identity | Similarity |
|---------|--------------------------------|----------|------------|
| AbrB1   | <i>Streptomyces coelicolor</i> | 34 %     | 55 %       |
| VraR    | <i>Staphylococcus aureus</i>   |          |            |
| VanR    | <i>Streptomyces coelicolor</i> | 31 %     | 48 %       |
| VanR    | <i>Staphylococcus aureus</i>   |          |            |
| AbrB1   | <i>Streptomyces coelicolor</i> | 35 %     | 54 %       |
| LiaR    | <i>Enterococcus faecium</i>    |          |            |
